# Supplementary material for: Synthesis of a biodegradable polymer in gas expanded solution: effect of the process on cytocompatibility
Source: Royal Society of Chemistry journal article supplement (doi:10.1039/c3gc36747a), 2013-01-01
Supplement: c3gc36747a.pdf [file c3gc36747a.pdf]

## Supplementary Information

# Synthesis of a Biodegradable Polymer in Gas Expanded Solution: Effect of Process on Cytocompatibility

**Sherry Y. Lee\*, Xia Zhong\*, Peter Valtchev and Fariba Dehghani<sup>†</sup>**

*School of Chemical and Biomolecular Engineering, University of Sydney, Sydney, NSW 2006,  
Australia*

*\*These two authors contributed equally to this work*

*†Corresponding author: T +61 2 93514794 | F +61 2 93512854*

**E fariba.dehghani@sydney.edu.au**

## Supplementary Tables

**S.Table 1** Molecular properties, yield and PEG residue analysis of the synthesised polymers

| Sample             | $M_n$ (g/mol) <sup>a</sup> | $M_w$ (g/mol) <sup>a</sup> | PDI <sup>b</sup> | Fu (mol %) <sup>c</sup> | U. PEG (%) <sup>d</sup> | Yield (%) <sup>e</sup> |
|--------------------|----------------------------|----------------------------|------------------|-------------------------|-------------------------|------------------------|
| P-0                | 5880                       | 9750                       | 1.66             | 0.75                    | 60                      | 13                     |
| P-0 <sup>M</sup>   | 5640                       | 9010                       | 1.60             | 1.78                    | 34                      | 37                     |
| P-1                | 6050                       | 8570                       | 1.42             | 0.89                    | 36                      | 20                     |
| P-3                | 5730                       | 8230                       | 1.44             | 1.67                    | 34                      | 44                     |
| P-5                | 5720                       | 8640                       | 1.51             | 1.55                    | 35                      | 45                     |
| P-5 <sup>100</sup> | 6230                       | 9320                       | 1.50             | 1.79                    | 36                      | 41                     |
| P-5 <sup>150</sup> | 5550                       | 7930                       | 1.43             | 1.74                    | 45                      | 40                     |
| P-7                | 5630                       | 8080                       | 1.44             | 1.48                    | 35                      | 45                     |
| P <sub>Conv</sub>  | 5990                       | 8860                       | 1.48             | 1.06                    | 37                      | 42                     |

<sup>a</sup> Calculated from GPC using PEG standard. <sup>b</sup> Polydispersity was an estimation with the exclusion of the residual PEG part, therefore can only be used as a horizontal comparison between the samples. <sup>c</sup> Fumarate molar percent in the polymer calculated from <sup>1</sup>HNMR integral. <sup>d</sup> Unreacted PEG was determined from GPC chromatograph using PEG calibration curve. <sup>e</sup> The yield was determined gravimetrically based on mass of polymer minus amount of unreacted PEG.
